# Supplementary material for: Model reactions and natural occurrence of furans from hypersaline environments
Source: Copernicus journal article supplement (doi:10.5194/bg-11-2871-2014), 2014-05-28
Supplement: Supplementary file 1 [file bg-11-2871-2014-supplement.pdf]

Supplement of Biogeosciences, 11, 2871–2882, 2014  
<http://www.biogeosciences.net/bg-11-2871-2014/>  
doi:10.5194/bg-11-2871-2014-supplement  
© Author(s) 2014. CC Attribution 3.0 License.

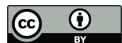

*Supplement of*

## **Model reactions and natural occurrence of furans from hypersaline environments**

**T. Krause et al.**

*Correspondence to:* T. Krause (torsten.krause@geow.uni-heidelberg.de)

**Table 1.** Parameters of Australian sediments of 2011.

| Samplesite        | Layer<br>(cm) | Geographical position |              | Iron<br>(w%) | pH  | Organic carbon<br>(w%) |
|-------------------|---------------|-----------------------|--------------|--------------|-----|------------------------|
| Lake Magic I      | 0-2           | S32.432488°           | E118.905544° | 1.0          | 5.0 | 0.9                    |
| Lake Magic II     | 14-22         | S32.432970°           | E118.905360° | 1.6          | 5.0 | 0.1                    |
| Lake Springfield* | 0-2           | S32.461780°           | E119.166200° | 1.5          | 5.1 | 2.2                    |
|                   | 2-4           |                       |              | 2.1          | 5.8 | 2.8                    |
|                   | 4-6           |                       |              | 2.0          | 6.4 | 1.3                    |
| Lake Tay          | 0-0.5         | S33.031390°           | E120.740700° | 0.5          | 6.4 | 0.9                    |
| Lake Orr* I       | 0-4           | S33.148681°           | E119.163755° | 1.0          | 5.9 | 0.5                    |
|                   | 4-6           |                       |              | 0.7          | 5.4 | 0.5                    |
|                   | 6-10          |                       |              | 1.3          | 5.4 | 0.4                    |
| Lake Orr* II      | 0-0.5         | S33.150270°           | E119.160960° | 1.2          | 5.7 | 0.4                    |
|                   | 0.5-2         |                       |              | 1.9          | 5.8 | 1.5                    |
|                   | 2-4           |                       |              | 2.0          | 6.3 | 1.4                    |
|                   | 4-6           |                       |              | 1.7          | 6.6 | 1.2                    |
| Lake Hatter Hill* | 0-2           | S33.099221°           | E119.839868° | 1.1          | 7.6 | 4.7                    |
|                   | 2-4           |                       |              | 1.3          | 8.4 | 2.0                    |
|                   | 4-6           |                       |              | 1.6          | 8.4 | 0.5                    |
|                   | 26-28         |                       |              | 0.8          | 7.9 | 0.2                    |
| Lake King I       | 0-0.5         | S33.089010°           | E119.618810° | 0.5          | 7.1 | 0.6                    |
|                   | 0.5-2         |                       |              | 0.8          | 7.9 | 0.8                    |
|                   | 2-4           |                       |              | 0.9          | 8.0 | 0.6                    |
|                   | 4-6           |                       |              | 0.8          | 7.9 | 0.3                    |
| Lake King II      | 0-2           | S33.090780°           | E119.617690° | 0.6          | 7.6 | 0.5                    |
|                   | 2-4           |                       |              | 0.5          | 7.9 | 0.2                    |
|                   | 4-6           |                       |              | 0.6          | 7.6 | 0.3                    |
| Lake Dune*        | 0-0.5         | S33.082940°           | E119.638370° | 2.1          | 7.9 | 0.8                    |
|                   | 0.5-1.5       |                       |              | 0.8          | 7.4 | 0.2                    |
|                   | 1.5-3.5       |                       |              | 2.5          | 6.0 | 1.3                    |
|                   | 3.5-6         |                       |              | 2.4          | 5.6 | 2.1                    |
| Lake Strawbridge* | 0-2           | S32.844030°           | E119.397990° | 1.4          | 8.1 | 1.3                    |
|                   | 2-4           |                       |              | 1.6          | 8.1 | 1.4                    |
|                   | 4-6           |                       |              | 1.6          | 8.1 | 2.1                    |
|                   | 6-8           |                       |              | 1.2          | 8.3 | 0.7                    |
| Lake Golf*        | 0-2           | S32.810020°           | E119.519620° | 3.6          | 7.5 | 2.0                    |
|                   | 2-4           |                       |              | 1.9          | 7.5 | 0.6                    |
|                   | 4-6           |                       |              | 3.1          | 6.7 | 0.2                    |
| Lake Stubbs I     | 0-0.5         | S33.060340°           | E118.996750° | 0.8          | 7.3 | 0.6                    |
|                   | 0.5-10        |                       |              | 1.5          | 8.0 | 1.0                    |
|                   | >10           |                       |              | 3.0          | 8.2 | 1.1                    |
| Lake Stubbs II    | 0-20          | S33.060360°           | E119.000350° | 1.6          | 8.2 | 0.8                    |
| Lake Stubbs III   | 0-2           | S33.060250°           | E118.996610° | 1.1          | 8.1 | 0.7                    |
|                   | 2-4           |                       |              | 1.1          | 8.3 | 0.5                    |
|                   | 4-6           |                       |              | 1.0          | 8.2 | 1.1                    |
|                   | 6-8           |                       |              | 1.6          | 8.2 | 0.6                    |
| Lake Whurr*       | 0-1           | S33.043120°           | E119.008820° | 2.4          | 4.8 | 0.8                    |
|                   | 1-2           |                       |              | 2.0          | 5.2 | 1.4                    |
|                   | 2-6           |                       |              | 1.7          | 5.8 | 1.6                    |
|                   | 6-7           |                       |              | 0.8          | 5.9 | 0.5                    |
|                   | >7            |                       |              | 2.4          | 5.4 | 0.5                    |

\* No official sample site name.

**Table 2.** Parameters of Australian sediments of 2012.

| Samplesite          | Layer | Geographical position |              | Iron | pH  | Organic carbon |
|---------------------|-------|-----------------------|--------------|------|-----|----------------|
|                     | (cm)  |                       |              |      |     |                |
| Lake Emu*           | 0-2   | S33.160990°           | E119.655110° | 1.2  | 6.9 | 1.7            |
|                     | 2-4   |                       |              | 0.8  | 7.8 | 1.5            |
| Stennets Lake       | 0-2   | S33.202230°           | E119.979520° | 0.8  | 7.3 | 2.7            |
| Lake Strawbridge*   | 0-4   | S32.844550°           | E119.397750° | 1.6  | 7.6 | 1.5            |
|                     | 4-6   |                       |              | 1.3  | 7.9 | 0.1            |
| Lake Gulson I       | 0-2   | S32.772020°           | E119.399680° | 0.7  | 7.8 | 0.7            |
|                     | 2-4   |                       |              | 0.6  | 8.2 | 0.2            |
|                     | 4-6   |                       |              | 0.6  | 7.8 | 0.2            |
| Lake Gulson II      | 0-0.5 | S32.7685°             | E119.39834°  | 0.5  | 7.6 | 0.5            |
| Lake Boats Claypan* | 0-2   | S33.06899°            | E119.63868°  | 2.5  | 4.3 | 5.9            |
|                     | 2-4   |                       |              | 2.7  | 4.5 | 4.0            |
|                     | 4-6   |                       |              | 2.6  | 4.5 | 3.7            |
| Lake Boats*         | 0-2   | S33.069214°           | E119.637771° | 1.0  | 4.7 | 1.0            |
|                     | 2-4   |                       |              | 1.2  | 4.2 | 3.2            |
|                     | 4-6   |                       |              | 0.9  | 4.6 | 0.9            |
| Lake Whurr*         | 0-1   | S33.041650°           | E119.010200° | 1.9  | 6.9 | 0.7            |
|                     | 1-4   |                       |              | 2.1  | 6.2 | 1.6            |
|                     | 4-6   |                       |              | 2.0  | 5.6 | 1.6            |
| Lake Orr*           | crust | S33.148180°           | E119.165160° | 1.0  | 5.0 | 0.2            |
|                     | 0-2   |                       |              | 1.5  | 5.9 | 0.5            |
|                     | 2-4   |                       |              | 1.6  | 5.2 | 0.7            |
| Lake Dune*          | 4-6   | S33.083720°           | E119.639450° | 1.5  | 4.9 | 0.8            |
|                     | 0-2   |                       |              | 0.7  | 4.8 | 0.1            |
|                     | 2-4   |                       |              | 0.8  | 5.4 | 0.2            |
| Lake Newton I       | 4-6   | S32.960670°           | E119.611770° | 0.7  | 5.6 | 0.5            |
|                     | 0-2   |                       |              | 0.6  | 7.5 | 0.5            |
|                     | 2-4   |                       |              | 0.5  | 7.6 | 0.3            |
| Lake Newton II      | 4-6   | S32.960486°           | E119.611766° | 0.8  | 7.6 | 0.2            |
|                     | 0-0.5 |                       |              | 0.5  | 6.8 | 1.1            |
|                     | 0.5-2 |                       |              | 0.5  | 7.7 | 0.5            |

\* No official sample site name.

**Table 3.** Parameters of Dead Sea sediments of 2012.

| Samplesite   | Layer | Geographical position |            | Iron | pH  | Organic carbon |
|--------------|-------|-----------------------|------------|------|-----|----------------|
|              | (cm)  |                       |            |      |     |                |
| Sodom* I     | crust | N30.96472°            | E35.36380° | 1.3  | 7.9 | 0.0            |
|              | 0-2   |                       |            | 1.5  | 7.9 | 0.2            |
|              | 2-4   |                       |            | 1.6  | 8.0 | 0.5            |
|              | 4-6   |                       |            | 1.7  | 8.0 | 0.6            |
|              | 6-8   |                       |            | 1.8  | 8.1 | 0.4            |
| Sodom* II    | crust | N30.96456°            | E35.36388° | 1.4  | 7.7 | 0.4            |
|              | 0-2   |                       |            | 1.2  | 8.0 | 0.4            |
|              | 2-4   |                       |            | 1.3  | 7.9 | 0.4            |
|              | 4-6   |                       |            | 1.6  | 7.9 | 0.3            |
| Sodom* Plant | crust | N30.96424°            | E35.36335° | 1.3  | 7.9 | 0.6            |
|              | 0-2   |                       |            | 1.5  | 7.8 | 0.5            |
|              | 2-4   |                       |            | 1.5  | 7.8 | 0.4            |
|              | 4-6   |                       |            | 1.5  | 7.9 | 0.4            |

\* No official sample site name.

**Table 4.** Emissions of furan and monoalkyl furans from Australian sediments of 2011.

| Samplesite        | Layer<br>(cm) | Furan<br>ng/g | 2-Methyl-<br>furan<br>ng/g | 3-Methyl-<br>furan<br>ng/g | 2-Ethyl-<br>furan<br>ng/g | 2-Propyl-<br>furan<br>ng/g | 2-Butyl-<br>furan<br>ng/g | 2-Pentyl-<br>furan<br>ng/g |
|-------------------|---------------|---------------|----------------------------|----------------------------|---------------------------|----------------------------|---------------------------|----------------------------|
| Lake Magic I      | 0-2           | -             | -                          | -                          | -                         | -                          | -                         | 1.39                       |
| Lake Magic II     | 14-22         | 3.40          | 30.83                      | 21.38                      | 6.85                      | 1.36                       | 2.85                      | 1.66                       |
| Lake Springfield* | 0-2           | 15.92         | 7.90                       | 8.54                       | 24.20                     | 2.21                       | 4.01                      | 4.91                       |
|                   | 2-4           | 42.36         | 39.20                      | 25.69                      | 49.10                     | 4.54                       | 10.72                     | 11.08                      |
|                   | 4-6           | 1.72          | 3.95                       | 4.82                       | 4.17                      | 1.56                       | 5.46                      | 8.16                       |
| Lake Tay          | 0-0.5         | 0.30          | 3.47                       | 1.58                       | -                         | -                          | 1.27                      | 4.62                       |
| Lake Orr* I       | 0-4           | 0.86          | 0.66                       | 0.43                       | 0.36                      | -                          | 0.68                      | 1.07                       |
|                   | 4-6           | 0.78          | 0.61                       | 0.40                       | 0.37                      | -                          | 0.67                      | 0.82                       |
|                   | 6-10          | 0.23          | 0.21                       | 0.20                       | -                         | -                          | -                         | -                          |
| Lake Orr* II      | 0-0.5         | 1.01          | 1.15                       | 0.73                       | 0.55                      | -                          | 1.11                      | 2.01                       |
|                   | 0.5-2         | 6.21          | 2.66                       | 2.93                       | 1.62                      | 1.00                       | 2.35                      | 2.68                       |
|                   | 2-4           | 9.21          | 2.83                       | 3.17                       | 1.29                      | 1.11                       | 2.14                      | 2.07                       |
|                   | 4-6           | 7.94          | 3.65                       | 3.19                       | 1.24                      | 1.09                       | 2.89                      | 2.67                       |
|                   | 6-8           | 0.67          | 0.54                       | 0.44                       | 0.23                      | -                          | 0.39                      | 0.57                       |
| Lake Hatter Hill* | 0-2           | 6.02          | 58.37                      | 80.69                      | 27.15                     | 5.53                       | 5.70                      | 1.24                       |
|                   | 2-4           | 3.40          | 30.83                      | 21.38                      | 6.85                      | 1.36                       | 2.85                      | 1.66                       |
|                   | 4-6           | 0.91          | 1.90                       | 1.55                       | 0.50                      | -                          | 0.71                      | 1.24                       |
| Lake King I       | 0-0.5         | 0.86          | 4.57                       | 5.24                       | 3.89                      | 1.82                       | 1.37                      | 1.53                       |
|                   | 0.5-2         | 1.14          | 7.94                       | 5.18                       | 2.42                      | 1.09                       | 1.19                      | 0.74                       |
|                   | 2-4           | 1.77          | 6.44                       | 3.00                       | 0.63                      | -                          | 0.45                      | -                          |
|                   | 4-6           | 0.56          | 2.13                       | 1.08                       | 0.26                      | -                          | -                         | -                          |
|                   | 26-28         | 3.48          | 4.29                       | 2.44                       | 1.16                      | 0.83                       | 1.23                      | 1.93                       |
| Lake King II      | 0-2           | 0.78          | 4.11                       | 2.77                       | 0.81                      | 0.46                       | 0.49                      | 0.38                       |
|                   | 2-4           | 0.39          | 1.30                       | 0.79                       | 0.12                      | -                          | 0.12                      | -                          |
|                   | 4-6           | 0.23          | 0.21                       | 0.20                       | -                         | -                          | -                         | -                          |
| Lake Dune* III    | 0-0.5         | 0.99          | 3.17                       | 1.04                       | 0.61                      | -                          | 0.78                      | -                          |
|                   | 0.5-1.5       | -             | 0.57                       | 0.15                       | -                         | -                          | 0.20                      | -                          |
|                   | 1.5-3.5       | 4.37          | 1.89                       | 1.72                       | 0.72                      | -                          | 1.79                      | 2.81                       |
|                   | 3.5-6         | 5.46          | 1.25                       | 1.83                       | 0.70                      | -                          | 1.95                      | 3.23                       |
| Lake Strawbridge* | 0-2           | 2.30          | 13.08                      | 12.23                      | 5.61                      | -                          | 4.31                      | 4.12                       |
|                   | 2-4           | 4.19          | 20.70                      | 14.14                      | 3.35                      | 1.93                       | 5.41                      | 4.81                       |
|                   | 4-6           | 3.90          | 25.23                      | 19.63                      | 5.00                      | 1.80                       | 3.63                      | -                          |
|                   | 6-8           | 1.34          | 2.11                       | 2.07                       | 2.08                      | 0.58                       | 1.93                      | 9.62                       |
| Lake Golf*        | 0-2           | 9.45          | 26.56                      | 17.95                      | 9.55                      | 3.46                       | 5.05                      | 4.11                       |
|                   | 2-4           | 3.48          | 4.29                       | 2.44                       | 1.16                      | 0.83                       | 1.23                      | 1.93                       |
|                   | 4-6           | 1.77          | 0.43                       | 0.38                       | 0.14                      | -                          | 0.52                      | -                          |
| Lake Stubbs I     | 0-0.5         | 0.44          | 4.39                       | 3.50                       | 1.99                      | -                          | 1.72                      | 4.85                       |
|                   | 0.5-10        | 3.86          | 1.70                       | 1.63                       | 1.73                      | 0.92                       | 2.13                      | 3.89                       |
|                   | >10           | 4.62          | 3.89                       | 2.81                       | 2.94                      | 0.93                       | 1.68                      | 2.27                       |
| Lake Stubbs II    | 0-20          | 4.05          | 3.16                       | 2.43                       | 2.15                      | 0.83                       | 1.88                      | 1.64                       |
| Lake Stubbs III   | 0-2           | 0.73          | 3.30                       | 1.80                       | 0.59                      | -                          | 0.42                      | -                          |
|                   | 2-4           | 0.97          | 1.17                       | 0.58                       | 0.44                      | -                          | 0.28                      | -                          |
|                   | 4-6           | 2.07          | 10.46                      | 7.06                       | 2.82                      | -                          | 0.79                      | -                          |
|                   | 6-8           | 0.40          | 1.16                       | 0.72                       | 0.92                      | -                          | 0.60                      | -                          |
| Lake Whurr*       | 0-1           | 3.86          | 1.70                       | 1.63                       | 1.73                      | 0.92                       | 2.13                      | 3.89                       |
|                   | 1-2           | 4.62          | 3.89                       | 2.81                       | 2.94                      | 0.93                       | 1.68                      | 2.27                       |
|                   | 2-6           | 4.05          | 3.16                       | 2.43                       | 2.15                      | 0.83                       | 1.88                      | 1.64                       |
|                   | 6-7           | 2.71          | -                          | 0.22                       | -                         | -                          | -                         | -                          |
|                   | >7            | 5.58          | -                          | 0.62                       | -                         | -                          | -                         | -                          |

\* No official sample site name. – Concentration below lowest calibration standard of 0.05 ng/g.

**Table 5.** Emissions of furan and monoalkyl furans from Australian sediments of 2012.

| Samplesite          | Layer<br>(cm) | Furan<br>ng/g | 2-Methyl-<br>furan<br>ng/g | 3-Methyl-<br>furan<br>ng/g | 2-Ethyl-<br>furan<br>ng/g | 2-Propyl-<br>furan<br>ng/g | 2-Butyl-<br>furan<br>ng/g | 2-Pentyl-<br>furan<br>ng/g |
|---------------------|---------------|---------------|----------------------------|----------------------------|---------------------------|----------------------------|---------------------------|----------------------------|
| Lake Emu*           | 0-2           | -             | 16.38                      | 10.62                      | 3.68                      | 1.14                       | 4.75                      | 6.03                       |
|                     | 2-4           | 0.37          | 0.61                       | 0.35                       | 0.16                      | -                          | -                         | 0.46                       |
| Stennets Lake       | 0-2           | 7.40          | 2.11                       | 1.49                       | 2.02                      | 0.69                       | 1.29                      | 2.06                       |
| Lake Strawbridge*   | 0-4           | 4.64          | 25.63                      | 23.30                      | 10.91                     | 2.37                       | 6.48                      | 10.45                      |
|                     | 4-6           | 1.21          | 0.69                       | 0.55                       | 0.33                      | 0.13                       | 0.33                      | 2.31                       |
| Lake Gulson I       | 0-2           | 0.50          | 2.73                       | 2.32                       | 0.65                      | 0.22                       | 0.56                      | 1.83                       |
|                     | 2-4           | 0.43          | 0.33                       | 0.34                       | 0.77                      | 0.13                       | 0.43                      | 1.77                       |
|                     | 4-6           | 0.30          | 0.45                       | 0.32                       | 0.09                      | 0.07                       | 0.08                      | 0.17                       |
| Lake Gulson II      | 0-0.5         | 0.25          | 0.78                       | 0.87                       | 0.45                      | -                          | 0.85                      | 8.41                       |
| Lake Boats Claypan* | 0-2           | 4.96          | 0.57                       | 0.73                       | 0.20                      | -                          | 0.45                      | -                          |
|                     | 2-4           | 4.27          | 0.86                       | 0.52                       | 0.09                      | -                          | -                         | -                          |
|                     | 4-6           | 3.02          | 0.58                       | 0.37                       | -                         | -                          | -                         | -                          |
| Lake Boats*         | 0-2           | 3.77          | 0.61                       | 0.39                       | 0.10                      | -                          | -                         | 2.23                       |
|                     | 2-4           | 7.98          | 0.61                       | 0.40                       | 0.07                      | -                          | -                         | -                          |
|                     | 4-6           | 4.07          | 0.84                       | 0.45                       | 0.07                      | -                          | -                         | -                          |
| Lake Whurr*         | 0-1           | 2.22          | 2.21                       | 0.92                       | 0.58                      | 0.30                       | 1.01                      | 1.69                       |
|                     | 1-4           | 9.94          | 2.69                       | 2.76                       | 2.27                      | 0.71                       | 1.49                      | 1.35                       |
|                     | 4-6           | 6.81          | 0.95                       | 1.05                       | 0.36                      | -                          | 0.60                      | -                          |
| Lake Orr*           | crust         | 1.15          | 0.92                       | 0.47                       | 0.24                      | -                          | 0.30                      | -                          |
|                     | 0-2           | 4.19          | 1.26                       | 0.98                       | 0.36                      | -                          | 0.65                      | -                          |
|                     | 2-4           | 5.16          | 0.95                       | 0.96                       | 0.51                      | -                          | 1.33                      | -                          |
| Lake Dune*          | 4-6           | 7.06          | 1.69                       | 1.34                       | 1.04                      | -                          | 1.16                      | -                          |
|                     | 0-2           | 1.01          | 0.22                       | 0.21                       | 0.08                      | -                          | 0.28                      | -                          |
|                     | 2-4           | 2.52          | 1.10                       | 0.41                       | 0.09                      | -                          | -                         | -                          |
| Lake Newton I       | 4-6           | 2.22          | 1.55                       | 0.31                       | -                         | -                          | -                         | -                          |
|                     | 0-2           | 0.40          | 1.59                       | 1.33                       | 0.41                      | 0.14                       | 0.29                      | 1.19                       |
|                     | 2-4           | 0.30          | 0.31                       | 0.28                       | -                         | -                          | -                         | 0.06                       |
| Lake Newton II      | 4-6           | 0.41          | 0.42                       | 0.32                       | 0.06                      | -                          | -                         | 0.08                       |
|                     | 0-0.5         | -             | 3.71                       | 1.57                       | 0.81                      | 0.36                       | 1.20                      | 3.31                       |
|                     | 0.5-2         | 0.40          | 0.14                       | 0.19                       | -                         | -                          | -                         | 0.13                       |

\* No official sample site name. – Concentration below lowest calibration standard of 0.05 ng/g.

**Table 6.** Emissions of furan and monoalkyl furans from Dead Sea sediments of 2012.

| Samplesite   | Layer<br>(cm) | Furan<br>ng/g | 2-Methyl-<br>furan<br>ng/g | 3-Methyl-<br>furan<br>ng/g | 2-Ethyl-<br>furan<br>ng/g | 2-Propyl-<br>furan<br>ng/g | 2-Butyl-<br>furan<br>ng/g | 2-Pentyl-<br>furan<br>ng/g |
|--------------|---------------|---------------|----------------------------|----------------------------|---------------------------|----------------------------|---------------------------|----------------------------|
| Sodom* I     | crust         | 0.31          | 0.34                       | 0.45                       | 0.14                      | 0.20                       | 0.18                      | 0.35                       |
|              | 0-2           | 0.22          | 0.24                       | 0.24                       | 0.05                      | -                          | 0.08                      | -                          |
|              | 2-4           | 0.16          | 0.18                       | 0.13                       | -                         | -                          | -                         | -                          |
|              | 4-6           | 0.14          | 0.22                       | 0.19                       | -                         | -                          | 0.08                      | -                          |
|              | 6-8           | 0.16          | 0.24                       | 0.28                       | 0.04                      | -                          | 0.08                      | -                          |
| Sodom* II    | crust         | 0.35          | 0.34                       | 0.44                       | 0.14                      | -                          | -                         | 0.65                       |
|              | 0-2           | 0.13          | 0.22                       | 0.26                       | 0.06                      | -                          | -                         | -                          |
|              | 2-4           | 0.19          | 0.24                       | 0.21                       | 0.04                      | -                          | 0.10                      | 0.18                       |
| Sodom* Plant | 4-6           | 0.21          | 0.13                       | 0.11                       | -                         | -                          | 0.08                      | -                          |
|              | crust         | 0.35          | 0.49                       | 0.67                       | 0.17                      | 0.22                       | 0.69                      | 0.62                       |
|              | 0-2           | 0.41          | 0.71                       | 0.75                       | 0.24                      | 0.18                       | -                         | -                          |
|              | 2-4           | 0.22          | 0.26                       | 0.21                       | 0.05                      | -                          | 0.11                      | 0.37                       |
|              | 4-6           | 0.24          | 0.14                       | 0.10                       | -                         | -                          | 0.08                      | 0.37                       |

\* No official sample site name. – Concentration below lowest calibration standard of 0.05 ng/g.

**Table 7.** Emissions of dimethyl- and halofurans from Australian sediments of 2011.

| Samplesite        | Layer<br>(cm) | 2,3-Dimethyl-<br>furan | 2,4-Dimethyl-<br>furan | 2,5-Dimethyl-<br>furan | 3-Chlorofuran | 3-Bromofuran |
|-------------------|---------------|------------------------|------------------------|------------------------|---------------|--------------|
|                   |               | ng/g                   | ng/g                   | ng/g                   | ng/g          | ng/g         |
| Lake Magic I      | 0-2           | -                      | -                      | -                      | -             | -            |
| Lake Magic II     | 14-22         | 0.35                   | 1.12                   | 1.14                   | -             | -            |
| Lake Springfield* | 0-2           | 0.40                   | 0.48                   | 2.57                   | 0.25          | -            |
|                   | 2-4           | 1.05                   | 0.87                   | 9.25                   | 0.13          | -            |
|                   | 4-6           | 0.16                   | 0.20                   | 3.90                   | -             | -            |
| Lake Tay          | 0-0.5         | -                      | -                      | -                      | -             | -            |
| Lake Orr* I       | 0-4           | -                      | -                      | 0.13                   | -             | -            |
|                   | 4-6           | -                      | -                      | 0.10                   | -             | -            |
|                   | 6-10          | -                      | -                      | -                      | -             | -            |
| Lake Orr* II      | 0-0.5         | -                      | 0.07                   | 0.21                   | -             | -            |
|                   | 0.5-2         | 0.12                   | 0.28                   | 0.57                   | -             | -            |
|                   | 2-4           | 0.13                   | 0.36                   | 0.62                   | -             | -            |
|                   | 4-6           | 0.12                   | 0.49                   | 0.59                   | -             | -            |
|                   | 6-8           | -                      | -                      | 0.15                   | -             | -            |
| Lake Hatter Hill* | 0-2           | 1.53                   | 3.26                   | 2.61                   | -             | -            |
|                   | 2-4           | 0.35                   | 1.12                   | 1.14                   | -             | -            |
|                   | 4-6           | 0.68                   | 0.15                   | 0.45                   | -             | -            |
| Lake King I       | 0-0.5         | 0.08                   | -                      | 0.16                   | -             | -            |
|                   | 0.5-2         | 0.28                   | 0.33                   | -                      | -             | -            |
|                   | 2-4           | 0.40                   | 0.25                   | 0.21                   | -             | -            |
|                   | 4-6           | -                      | -                      | -                      | -             | -            |
|                   | 26-28         | 0.30                   | 0.41                   | 0.46                   | -             | -            |
| Lake King II      | 0-2           | -                      | -                      | -                      | -             | -            |
|                   | 2-4           | -                      | -                      | -                      | -             | -            |
|                   | 4-6           | -                      | -                      | -                      | -             | -            |
| Lake Dune* III    | 0-0.5         | 0.62                   | 0.25                   | 0.29                   | -             | -            |
|                   | 0.5-1.5       | -                      | -                      | 0.11                   | -             | -            |
|                   | 1.5-3.5       | -                      | -                      | 1.03                   | -             | -            |
|                   | 3.5-6         | -                      | 0.33                   | 1.69                   | -             | -            |
| Lake Strawbridge* | 0-2           | 0.54                   | 0.47                   | 0.49                   | -             | -            |
|                   | 2-4           | 0.29                   | 0.25                   | 0.39                   | -             | -            |
|                   | 4-6           | 0.26                   | 0.38                   | 0.65                   | -             | -            |
|                   | 6-8           | 0.43                   | 0.12                   | 0.17                   | -             | -            |
| Lake Golf*        | 0-2           | 0.81                   | 1.65                   | 1.31                   | -             | -            |
|                   | 2-4           | 0.30                   | 0.41                   | 0.46                   | -             | -            |
|                   | 4-6           | 0.09                   | 0.14                   | 0.16                   | -             | -            |
| Lake Stubbs I     | 0-0.5         | 0.28                   | 0.17                   | -                      | -             | -            |
|                   | 0.5-10        | 0.10                   | 0.16                   | 0.43                   | -             | -            |
|                   | >10           | 0.14                   | 0.17                   | 1.01                   | -             | -            |
| Lake Stubbs II    | 0-20          | -                      | 0.13                   | 1.38                   | -             | -            |
| Lake Stubbs III   | 0-2           | 0.14                   | 0.24                   | 0.11                   | -             | -            |
|                   | 2-4           | 0.04                   | -                      | 0.04                   | -             | -            |
|                   | 4-6           | 0.11                   | 0.41                   | 0.46                   | -             | -            |
|                   | 6-8           | 0.54                   | 0.16                   | 0.14                   | -             | -            |
| Lake Whurr*       | 0-1           | 0.10                   | 0.16                   | 0.43                   | -             | -            |
|                   | 1-2           | 0.14                   | 0.17                   | 1.01                   | -             | -            |
|                   | 2-6           | -                      | 0.13                   | 1.38                   | -             | -            |
|                   | 6-7           | -                      | -                      | 0.11                   | -             | -            |
|                   | >7            | -                      | -                      | 0.25                   | 0.37          | -            |

\* No official sample site name. – Concentration below lowest calibration standard of 0.05 ng/g.

**Table 8.** Emissions of dimethyl- and halofurans from Australian sediments of 2012.

| Samplesite          | Layer<br>(cm) | 2,3-Dimethyl-<br>furan | 2,4-Dimethyl-<br>furan | 2,5-Dimethyl-<br>furan | 3-Chlorofuran | 3-Bromofuran |
|---------------------|---------------|------------------------|------------------------|------------------------|---------------|--------------|
|                     |               | ng/g                   | ng/g                   | ng/g                   | ng/g          | ng/g         |
| Lake Emu*           | 0-2           | 1.25                   | 0.60                   | 0.59                   | -             | -            |
|                     | 2-4           | 0.55                   | -                      | 0.07                   | -             | -            |
| Stennets Lake       | 0-2           | 0.07                   | 0.05                   | 0.16                   | -             | -            |
| Lake Strawbridge*   | 0-4           | 0.67                   | 1.31                   | 1.26                   | -             | -            |
|                     | 4-6           | 0.38                   | 0.12                   | 0.20                   | -             | -            |
| Lake Gulson I       | 0-2           | 0.26                   | 0.10                   | 0.12                   | -             | -            |
|                     | 2-4           | 0.11                   | -                      | 0.07                   | -             | -            |
|                     | 4-6           | 0.19                   | -                      | 0.08                   | -             | -            |
| Lake Gulson II      | 0-0.5         | 0.10                   | -                      | -                      | -             | -            |
| Lake Boats Claypan* | 0-2           | -                      | -                      | 0.52                   | -             | -            |
|                     | 2-4           | -                      | -                      | 0.28                   | -             | -            |
|                     | 4-6           | -                      | -                      | 0.19                   | -             | -            |
| Lake Boats*         | 0-2           | -                      | -                      | 0.35                   | -             | -            |
|                     | 2-4           | -                      | -                      | 0.63                   | -             | -            |
|                     | 4-6           | -                      | -                      | 0.31                   | -             | -            |
| Lake Whurr*         | 0-1           | 0.09                   | 0.10                   | 0.24                   | -             | -            |
|                     | 1-4           | -                      | 0.16                   | 0.86                   | -             | -            |
|                     | 4-6           | -                      | 0.04                   | 0.85                   | -             | -            |
| Lake Orr*           | crust         | -                      | -                      | 0.12                   | -             | -            |
|                     | 0-2           | -                      | 0.11                   | 0.22                   | -             | -            |
|                     | 2-4           | -                      | 0.13                   | 0.28                   | -             | -            |
|                     | 4-6           | -                      | 0.07                   | 0.30                   | -             | -            |
| Lake Dune*          | 0-2           | -                      | -                      | 0.05                   | -             | -            |
|                     | 2-4           | -                      | -                      | 0.07                   | -             | -            |
|                     | 4-6           | -                      | -                      | 0.05                   | -             | -            |
| Lake Newton I       | 0-2           | 0.11                   | 0.07                   | 0.20                   | -             | -            |
|                     | 2-4           | 0.07                   | -                      | 0.13                   | -             | -            |
|                     | 4-6           | 0.20                   | -                      | 0.16                   | -             | -            |
| Lake Newton II      | 0-0.5         | -                      | -                      | -                      | -             | -            |
|                     | 0.5-2         | 0.07                   | -                      | 0.04                   | -             | -            |

\* No official sample site name. – Concentration below lowest calibration standard of 0.05 ng/g.

**Table 9.** Emissions of dimethyl- and halofurans from Dead Sea sediments of 2012.

| Samplesite   | Layer<br>(cm) | 2,3-Dimethyl-<br>furan | 2,4-Dimethyl-<br>furan | 2,5-Dimethyl-<br>furan | 3-Chlorofuran | 3-Bromofuran |
|--------------|---------------|------------------------|------------------------|------------------------|---------------|--------------|
|              |               | ng/g                   | ng/g                   | ng/g                   | ng/g          | ng/g         |
| Sodom* I     | crust         | 0.10                   | -                      | 0.06                   | -             | -            |
|              | 0-2           | -                      | -                      | -                      | -             | -            |
|              | 2-4           | -                      | -                      | -                      | -             | -            |
|              | 4-6           | -                      | 0.05                   | 0.04                   | -             | -            |
|              | 6-8           | 0.05                   | -                      | 0.04                   | -             | -            |
| Sodom* II    | crust         | 0.13                   | 0.05                   | 0.09                   | -             | -            |
|              | 0-2           | -                      | -                      | 0.04                   | -             | -            |
|              | 2-4           | -                      | -                      | 0.04                   | -             | -            |
| Sodom* Plant | 4-6           | -                      | -                      | -                      | -             | -            |
|              | crust         | 0.13                   | 0.06                   | 0.10                   | -             | -            |
|              | 0-2           | -                      | -                      | 0.07                   | -             | -            |
|              | 2-4           | -                      | -                      | -                      | -             | -            |
|              | 4-6           | -                      | -                      | -                      | -             | -            |

\* No official sample site name. – Concentration below lowest calibration standard of 0.05 ng/g.

**Table 10.** Emissions of different VOC from Australian sediments of 2011.

| Samplesite        | Layer<br>(cm) | Isoprene<br>ng/g | Benzene<br>ng/g | Toluene<br>ng/g | Ethylbenzene<br>ng/g | Thiophene<br>ng/g | 2-Methyl-<br>thiophene<br>ng/g | 3-Methyl-<br>thiophene<br>ng/g |
|-------------------|---------------|------------------|-----------------|-----------------|----------------------|-------------------|--------------------------------|--------------------------------|
| Lake Magic I      | 0-2           | -                | -               | 0.75            | -                    | -                 | -                              | -                              |
| Lake Magic II     | 14-22         | 5.78             | -               | 4.27            | 1.04                 | 0.61              | 1.88                           | 3.19                           |
| Lake Springfield* | 0-2           | 1.01             | 0.70            | 4.85            | 2.12                 | 1.81              | 1.74                           | 0.63                           |
|                   | 2-4           | -                | 1.66            | 6.97            | 2.89                 | 3.45              | 5.56                           | 1.56                           |
|                   | 4-6           | -                | 0.79            | 4.53            | 2.03                 | 1.65              | 2.48                           | 0.66                           |
| Lake Tay          | 0-0.5         | 30.53            | 0.10            | 0.38            | 0.52                 | -                 | 0.09                           | -                              |
| Lake Orr* I       | 0-4           | -                | -               | 0.51            | -                    | -                 | -                              | -                              |
|                   | 4-6           | -                | -               | 0.53            | -                    | -                 | -                              | -                              |
|                   | 6-10          | 0.18             | -               | 0.07            | 0.09                 | -                 | 0.05                           | -                              |
| Lake Orr* II      | 0-0.5         | 2.28             | 0.41            | 1.36            | 0.50                 | 0.04              | 0.13                           | 0.05                           |
|                   | 0.5-2         | -                | 0.80            | 6.99            | 3.28                 | 0.43              | 0.72                           | 0.33                           |
|                   | 2-4           | -                | 0.98            | 6.61            | 2.67                 | 0.55              | 1.05                           | 0.35                           |
|                   | 4-6           | -                | 1.42            | 6.83            | 2.29                 | 0.60              | 1.09                           | 0.36                           |
|                   | 6-8           | -                | 0.24            | 0.69            | 0.86                 | 0.07              | 0.17                           | 0.06                           |
| Lake Hatter Hill* | 0-2           | 110.64           | -               | 6.39            | 0.83                 | 1.19              | 5.69                           | 5.03                           |
|                   | 2-4           | 5.78             | -               | 4.27            | 1.04                 | 0.61              | 1.88                           | 3.19                           |
|                   | 4-6           | 1.21             | -               | 2.19            | 0.79                 | 0.17              | 0.40                           | 0.25                           |
| Lake King I       | 0-0.5         | 13.61            | -               | 0.14            | 0.08                 | 0.07              | 0.10                           | 0.10                           |
|                   | 0.5-2         | 49.49            | -               | 0.74            | 0.18                 | 0.11              | 0.28                           | 0.22                           |
|                   | 2-4           | 3.10             | -               | 0.65            | 0.36                 | 0.12              | 0.19                           | 0.14                           |
|                   | 4-6           | 1.15             | -               | 0.15            | 0.10                 | 0.04              | 0.07                           | 0.05                           |
|                   | 26-28         | 2.30             | 1.02            | 9.49            | 2.99                 | 0.09              | 0.23                           | 0.23                           |
| Lake King II      | 0-2           | 9.18             | -               | 0.10            | 0.06                 | 0.08              | 0.16                           | 0.18                           |
|                   | 2-4           | 0.18             | -               | 0.09            | 0.08                 | -                 | 0.08                           | 0.06                           |
|                   | 4-6           | 0.18             | -               | 0.07            | 0.09                 | -                 | 0.05                           | -                              |
| Lake Dune* III    | 0-0.5         | 1.10             | 0.62            | 5.92            | 3.64                 | 0.05              | 0.09                           | 0.12                           |
|                   | 0.5-1.5       | -                | 0.05            | 0.39            | 0.09                 | -                 | -                              | -                              |
|                   | 1.5-3.5       | 0.07             | 0.97            | 16.26           | 1.77                 | 0.21              | 0.37                           | 0.26                           |
|                   | 3.5-6         | -                | 2.31            | 14.48           | 3.24                 | 0.72              | 1.13                           | 0.67                           |
| Lake Strawbridge* | 0-2           | 19.45            | -               | 1.95            | 1.38                 | 0.33              | 1.04                           | 0.46                           |
|                   | 2-4           | 7.34             | 0.14            | 2.10            | 2.00                 | 0.55              | 0.70                           | 0.32                           |
|                   | 4-6           | 9.17             | 0.30            | 2.72            | 2.50                 | 0.89              | 1.02                           | 0.47                           |
|                   | 6-8           | 1.77             | 0.31            | 1.00            | 1.34                 | 0.18              | 0.24                           | 0.11                           |
| Lake Golf*        | 0-2           | 29.64            | 1.37            | 13.41           | 2.60                 | 0.31              | 0.71                           | 0.63                           |
|                   | 2-4           | 2.30             | 1.02            | 9.49            | 2.99                 | 0.09              | 0.23                           | 0.23                           |
|                   | 4-6           | 0.20             | 0.75            | 6.87            | 4.04                 | -                 | 0.07                           | 0.10                           |
| Lake Stubbs I     | 0-0.5         | 29.28            | 0.16            | 0.67            | 0.44                 | -                 | 0.18                           | 0.18                           |
|                   | 0.5-10        | 0.06             | 0.22            | 1.86            | 0.65                 | 0.14              | 0.24                           | 0.12                           |
|                   | >10           | 0.47             | 0.24            | 3.05            | 1.04                 | 0.61              | 0.78                           | 0.34                           |
| Lake Stubbs II    | 0-20          | 0.43             | 0.24            | 3.06            | 1.15                 | 0.50              | 1.16                           | 0.38                           |
| Lake Stubbs III   | 0-2           | 10.48            | 0.23            | 0.27            | 0.23                 | -                 | 0.07                           | 0.09                           |
|                   | 2-4           | 0.63             | 0.08            | 0.43            | 0.46                 | -                 | 0.04                           | -                              |
|                   | 4-6           | 10.12            | 0.25            | 1.26            | 1.23                 | 0.41              | 1.13                           | 0.41                           |
|                   | 6-8           | 0.74             | -               | 1.66            | 1.61                 | -                 | 0.07                           | 0.06                           |
| Lake Whurr*       | 0-1           | 0.06             | 0.22            | 1.86            | 0.65                 | 0.14              | 0.24                           | 0.12                           |
|                   | 1-2           | 0.47             | 0.24            | 3.05            | 1.04                 | 0.61              | 0.78                           | 0.34                           |
|                   | 2-6           | 0.43             | 0.24            | 3.06            | 1.15                 | 0.50              | 1.16                           | 0.38                           |
|                   | 6-7           | 0.12             | 0.07            | 0.19            | -                    | 0.15              | 0.20                           | 0.08                           |
|                   | >7            | 0.04             | 0.64            | 5.43            | 1.40                 | 0.21              | 0.31                           | 0.13                           |

\* No official sample site name. – Concentration below lowest calibration standard of 0.05 ng/g.



**Table 11.** Emissions of different VOC from Australian sediments of 2011.

| Samplesite          | Layer<br>(cm) | Isoprene<br>ng/g | Benzene<br>ng/g | Toluene<br>ng/g | Ethylbenzene<br>ng/g | Thiophene<br>ng/g | 2-Methyl-<br>thiophene<br>ng/g | 3-Methyl-<br>thiophene<br>ng/g |
|---------------------|---------------|------------------|-----------------|-----------------|----------------------|-------------------|--------------------------------|--------------------------------|
| Lake Emu*           | 0-2           | 97.50            | -               | 2.27            | 0.44                 | 0.13              | 1.24                           | 0.67                           |
|                     | 2-4           | 0.22             | 0.06            | -               | -                    | 0.04              | 0.07                           | -                              |
| Stennets Lake       | 0-2           | 5.03             | 0.86            | 1.85            | 0.48                 | 0.10              | 0.14                           | 0.10                           |
| Lake Strawbridge*   | 0-4           | 14.66            | 0.56            | 4.03            | 2.28                 | 0.72              | 2.47                           | 1.43                           |
|                     | 4-6           | 0.34             | 0.19            | 0.68            | 0.55                 | 0.11              | 0.19                           | 0.07                           |
| Lake Gulson I       | 0-2           | 5.28             | 0.23            | 0.89            | 0.12                 | -                 | 0.12                           | 0.11                           |
|                     | 2-4           | 2.02             | 0.17            | -               | 0.04                 | -                 | -                              | -                              |
|                     | 4-6           | 0.56             | 0.20            | 0.19            | 0.08                 | -                 | -                              | 0.06                           |
| Lake Gulson II      | 0-0.5         | 13.47            | 0.13            | -               | -                    | -                 | -                              | -                              |
| Lake Boats Claypan* | 0-2           | 0.27             | 1.33            | 18.25           | 2.17                 | -                 | -                              | -                              |
|                     | 2-4           | 0.52             | 2.26            | 20.73           | 2.78                 | -                 | -                              | -                              |
|                     | 4-6           | 0.19             | 1.52            | 10.30           | 1.43                 | -                 | -                              | -                              |
| Lake Boats*         | 0-2           | 0.22             | 0.14            | 3.90            | 0.24                 | 0.07              | 0.08                           | 0.06                           |
|                     | 2-4           | 0.14             | 0.54            | 7.84            | 0.40                 | 0.23              | 0.23                           | 0.26                           |
|                     | 4-6           | -                | 0.23            | 2.28            | 0.47                 | 0.19              | 0.19                           | 0.18                           |
| Lake Whurr*         | 0-1           | 0.93             | 0.14            | 0.62            | 0.45                 | 0.14              | 0.20                           | 0.17                           |
|                     | 1-4           | -                | 0.55            | 2.34            | 0.56                 | 0.53              | 1.14                           | 0.41                           |
|                     | 4-6           | -                | 0.30            | 2.68            | 1.19                 | 0.54              | 1.24                           | 0.43                           |
| Lake Orr*           | crust         | 0.05             | 0.15            | 0.28            | 0.11                 | -                 | 0.07                           | 0.05                           |
|                     | 0-2           | -                | 0.37            | 2.29            | 0.92                 | 0.17              | 0.22                           | 0.30                           |
|                     | 2-4           | -                | 0.59            | 2.98            | 1.16                 | 0.22              | 0.23                           | 0.33                           |
|                     | 4-6           | -                | 0.48            | 3.63            | 1.38                 | 0.29              | 0.26                           | 0.29                           |
| Lake Dune*          | 0-2           | 0.06             | 0.22            | -               | -                    | -                 | -                              | -                              |
|                     | 2-4           | 0.10             | 0.16            | 0.13            | 0.12                 | 0.05              | -                              | 0.04                           |
|                     | 4-6           | 0.04             | 0.29            | 0.42            | 0.38                 | 0.09              | -                              | 0.06                           |
| Lake Newton I       | 0-2           | 6.27             | 0.28            | 1.02            | 0.06                 | -                 | 0.14                           | 0.13                           |
|                     | 2-4           | 0.06             | 0.34            | 0.20            | -                    | 0.04              | 0.06                           | 0.04                           |
|                     | 4-6           | 0.16             | 0.29            | 0.22            | 0.05                 | -                 | 0.06                           | 0.04                           |
| Lake Newton II      | 0-0.5         | 100.51           | 0.73            | 1.37            | 0.26                 | -                 | 0.12                           | 0.04                           |
|                     | 0.5-2         | 2.21             | 0.48            | 0.34            | 0.10                 | -                 | -                              | -                              |

\* No official sample site name. – Concentration below lowest calibration standard of 0.05 ng/g.

**Table 12.** Emissions of different VOC from Australian sediments of 2011.

| Samplesite   | Layer<br>(cm) | Isoprene<br>ng/g | Benzene<br>ng/g | Toluene<br>ng/g | Ethylbenzene<br>ng/g | Thiophene<br>ng/g | 2-Methyl-<br>thiophene<br>ng/g | 3-Methyl-<br>thiophene<br>ng/g |
|--------------|---------------|------------------|-----------------|-----------------|----------------------|-------------------|--------------------------------|--------------------------------|
| Sodom* I     | crust         | 3.52             | 0.04            | 0.05            | 0.43                 | -                 | -                              | -                              |
|              | 0.5-2         | 1.48             | 0.06            | 0.05            | 0.67                 | -                 | -                              | 0.04                           |
|              | 2-4           | 0.64             | -               | 0.11            | 0.46                 | -                 | -                              | -                              |
|              | 4-6           | 2.01             | -               | 0.47            | 0.38                 | -                 | -                              | -                              |
|              | 6-8           | 2.82             | -               | 0.66            | 0.45                 | -                 | -                              | -                              |
| Sodom* II    | crust         | 3.61             | -               | 0.09            | 0.42                 | -                 | -                              | -                              |
|              | 0.5-2         | 1.14             | 0.05            | 0.07            | -                    | -                 | -                              | 0.04                           |
|              | 2-4           | 0.10             | 0.07            | 0.08            | 0.42                 | -                 | -                              | 0.04                           |
| Sodom* Plant | 4-6           | -                | 0.13            | 0.38            | 0.76                 | -                 | -                              | 0.05                           |
|              | crust         | 4.28             | 0.08            | 0.21            | 0.61                 | -                 | 0.04                           | 0.06                           |
|              | 0-2           | 3.62             | 0.06            | 0.22            | 0.85                 | -                 | 0.05                           | 0.06                           |
|              | 2-4           | 0.11             | -               | 0.14            | 0.41                 | -                 | -                              | 0.04                           |
|              | 4-6           | -                | 0.09            | 0.44            | 0.79                 | -                 | 0.04                           | 0.05                           |

\* No official sample site name. – Concentration below lowest calibration standard of 0.05 ng/g.

**Table 13.** Properties of the Australian water samples of 2011.

| Samplesite        |               | Geographical position |              | Iron | pH  | Organic carbon |
|-------------------|---------------|-----------------------|--------------|------|-----|----------------|
|                   |               |                       |              | mg/L |     | mg/L           |
| Lake Orr*         | ground water  | S33.148681°           | E119.163755° | 13.6 | 3.1 | 53             |
| Lake Springfield* | surface water | S32.461780°           | E119.166200° | 84.0 | 3.4 | 89             |
| Lake Dune*        | surface water | S33.083083°           | E119.639139° | 24.0 | 2.6 | 55             |
| Lake Golf*        | ground water  | S32.810390°           | E119.518654° | 18.0 | 5.1 | 39             |
| Lake Strawbridge* | ground water  | S32.844030°           | E119.397990° | 0.64 | 7.1 | 107            |
| Lake Hatter Hill* | ground water  | S33.099221°           | E119.839868° | 0.22 | 7.2 | 1266           |
| Lake King         | surface water | S33.089010°           | E119.618810° | 0.66 | 7.4 | 104            |
| Lake Stubbs       | ground water  | S33.060340°           | E118.996750° | 2.26 | 7.2 | 26             |

\* No official sample site names.

**Table 14.** Properties of the Australian water samples of 2012.

| Samplesite        |               | Geographical position |              | Iron | pH  | Organic carbon |
|-------------------|---------------|-----------------------|--------------|------|-----|----------------|
|                   |               |                       |              | mg/L |     | Mg/L           |
| Lake Newton       | ground water  | S32.960670°           | E119.611770° | 2.88 | 6.3 | 86             |
| Lake Strawbridge* | surface water | S32.844550°           | E119.397750° | 0.47 | 7.4 | 280            |
| Lake Boats*       | surface water | S33.069214°           | E119.637771° | 173  | 2.4 | 101            |
| Stennets Lake     | surface water | S33.202230°           | E119.979520° | -    | 8.7 | 44             |
| Lake Dune*        | surface water | S33.085950°           | E119.637450° | 1.77 | 3.5 | 26             |
| Lake Orr*         | surface water | S33.148180°           | E119.165160° | 7.41 | 3.1 | 34             |
| Lake Emu*         | surface water | S33.160990°           | E119.655110° | -    | 5.7 | 65             |
| Lake Whurr*       | surface water | S33.041650°           | E119.010200° | 65.5 | 3.1 | 37             |

\* No official sample site names.

**Table 15.** Properties of the Dead Sea water samples of 2012.

| Samplesite    |               | Geographical position |             | Iron | pH  | Organic carbon |
|---------------|---------------|-----------------------|-------------|------|-----|----------------|
|               |               |                       |             | Mg/L |     | Mg/L           |
| South End* I  | surface water | N30.965436°           | E35.366744° | -    | 5.1 | -              |
| South End* II | surface water | N30.965436°           | E35.366744° | -    | 5.1 | -              |
| Sodom* I      | ground water  | N30.964397°           | E35.363672° | -    | 6.5 | -              |
| Sodom* II     | ground water  | N30.964583°           | E35.363028° | -    | 6.5 | -              |
| Sodom* Plant  | ground water  | N30.964553°           | E35.362258° | -    | 6.5 | -              |
| En Gedi       | surface water | N31.467156°           | E35.398942° | -    | 6.0 | -              |
| En Bokek      | surface water | N31.201047°           | E35.366775° | -    | 6.0 | -              |

\* No official sample site names.

**Table 16.** Emissions of furan and monoalkyl furans from Australian water samples of 2011.

| Samplesite        | Furan | 2-Methylfuran | 3-Methylfuran | 2-Ethylfuran | 2-Propylfuran | 2-Butylfuran | 2-Pentylfuran |
|-------------------|-------|---------------|---------------|--------------|---------------|--------------|---------------|
|                   | ng/mL | ng/mL         | ng/mL         | ng/mL        | ng/mL         | ng/mL        | ng/mL         |
| Lake Orr*         | 0.118 | 0.104         | 0.589         | 0.034        | 0.016         | 0.028        | 0.046         |
| Lake Springfield* | 0.854 | 0.377         | 2.306         | 0.134        | 0.041         | 0.015        | 0.031         |
| Lake Dune*        | 0.170 | 0.064         | 0.312         | 0.017        | 0.008         | 0.008        | -             |
| Lake Golf*        | 0.028 | 0.011         | 0.008         | -            | -             | -            | -             |
| Lake Strawbridge* | 0.123 | 0.879         | 0.355         | 0.034        | -             | 0.048        | -             |
| Lake Hatter Hill* | 0.066 | 0.285         | 0.148         | -            | -             | 0.012        | -             |
| Lake King         | 0.070 | 0.112         | 0.029         | -            | -             | -            | -             |
| Lake Stubbs       | -     | -             | -             | -            | -             | -            | -             |

\* No official sample site name. – Concentration below lowest calibration standard of 0.005 ng/mL.

**Table 17.** Emissions of furan and monoalkyl furans from Australian water samples of 2012.

| Samplesite        | Furan | 2-Methylfuran | 3-Methylfuran | 2-Ethylfuran | 2-Propylfuran | 2-Butylfuran | 2-Pentylfuran |
|-------------------|-------|---------------|---------------|--------------|---------------|--------------|---------------|
|                   | ng/mL | ng/mL         | ng/mL         | ng/mL        | ng/mL         | ng/mL        | ng/mL         |
| Lake Newton       | 0.066 | 0.703         | 0.421         | 0.044        | -             | -            | -             |
| Lake Strawbridge* | 0.052 | 1.111         | 0.830         | 0.078        | -             | 0.018        | -             |
| Lake Boats*       | 0.915 | 0.185         | 2.879         | 0.162        | 0.031         | 0.038        | -             |
| Stennets Lake     | -     | 0.016         | 0.018         | -            | -             | -            | -             |
| Lake Dune*        | 0.101 | 0.138         | 0.157         | -            | -             | -            | -             |
| Lake Orr*         | 0.131 | 0.113         | 0.382         | -            | 0.011         | -            | -             |
| Lake Emu*         | 0.337 | 0.650         | 0.047         | 0.010        | -             | -            | -             |
| Lake Whurr*       | 0.417 | 0.123         | 0.953         | 0.056        | 0.024         | 0.019        | -             |

\* No official sample site name. – Concentration below lowest calibration standard of 0.005 ng/mL.

**Table 18.** Emissions of furan and monoalkyl furans from Dead Sea water samples of 2012.

| Samplesite    | Furan | 2-Methylfuran | 3-Methylfuran | 2-Ethylfuran | 2-Propylfuran | 2-Butylfuran | 2-Pentylfuran |
|---------------|-------|---------------|---------------|--------------|---------------|--------------|---------------|
|               | ng/mL | ng/mL         | ng/mL         | ng/mL        | ng/mL         | ng/mL        | ng/mL         |
| South End* I  | 0.043 | 0.044         | 0.011         | 0.024        | -             | -            | -             |
| South End* II | 0.021 | 0.006         | 0.007         | -            | -             | -            | -             |
| Sodom* I      | 0.040 | 0.018         | 0.018         | -            | -             | -            | -             |
| Sodom* II     | 0.027 | 0.016         | 0.025         | -            | -             | -            | -             |
| Sodom* Plant  | 0.032 | 0.013         | 0.030         | -            | -             | 0.013        | -             |
| En Gedi       | 0.013 | -             | 0.005         | -            | -             | -            | -             |
| En Bokek      | 0.042 | 0.013         | 0.017         | 0.009        | -             | -            | -             |

\* No official sample site name. – Concentration below lowest calibration standard of 0.005 ng/mL.

**Table 19.** Emissions of dimethyl- and halofurans from Australian water samples of 2011.

| Samplesite        | 2,3-Dimethylfuran | 2,4-Dimethylfuran | 2,5-Dimethylfuran | 3-Chlorofuran | 3-Bromofuran |
|-------------------|-------------------|-------------------|-------------------|---------------|--------------|
|                   | ng/mL             | ng/mL             | ng/mL             | ng/mL         | ng/mL        |
| Lake Orr*         | 0.010             | 0.012             | 0.042             | -             | -            |
| Lake Springfield* | 0.034             | 0.037             | 0.461             | -             | -            |
| Lake Dune*        | 0.004             | 0.007             | 0.062             | -             | -            |
| Lake Golf*        | -                 | -                 | 0.004             | -             | -            |
| Lake Strawbridge* | 0.016             | 0.027             | 0.022             | -             | -            |
| Lake Hatter Hill* | 0.012             | 0.029             | 0.024             | -             | -            |
| Lake King         | -                 | -                 | 0.005             | -             | -            |
| Lake Stubbs       | -                 | -                 | -                 | -             | -            |

\* No official sample site name. – Concentration below lowest calibration standard of 0.005 ng/mL.

**Table 20.** Emissions of dimethyl- and halofurans from Australian water samples of 2012.

| Samplesite        | 2,3-Dimethyl-furan | 2,4-Dimethyl-furan | 2,5-Dimethyl-furan | 3-Chlorofuran | 3-Bromofuran |
|-------------------|--------------------|--------------------|--------------------|---------------|--------------|
|                   | ng/mL              | ng/mL              | ng/mL              | ng/mL         | ng/mL        |
| Lake Newton       | 0.014              | 0.027              | 0.030              | -             | -            |
| Lake Strawbridge* | 0.026              | 0.081              | 0.065              | -             | -            |
| Lake Boats*       | 0.013              | 0.038              | 0.536              | 0.348         | 0.032        |
| Stennets Lake     | -                  | -                  | 0.004              | -             | -            |
| Lake Dune*        | -                  | 0.015              | 0.059              | 0.017         | 0.015        |
| Lake Orr*         | -                  | 0.010              | 0.096              | 0.032         | 0.020        |
| Lake Emu*         | -                  | 0.023              | 0.014              | -             | -            |
| Lake Whurr*       | 0.029              | 0.022              | 0.764              | 0.009         | -            |

\* No official sample site name. – Concentration below lowest calibration standard of 0.005 ng/mL.

**Table 21.** Emissions of dimethyl- and halofurans from Dead Sea water samples of 2012.

| Samplesite    | 2,3-Dimethyl-furan | 2,4-Dimethyl-furan | 2,5-Dimethyl-furan | 3-Chlorofuran | 3-Bromofuran |
|---------------|--------------------|--------------------|--------------------|---------------|--------------|
|               | ng/mL              | ng/mL              | ng/mL              | ng/mL         | ng/mL        |
| South End* I  | -                  | -                  | -                  | -             | -            |
| South End* II | -                  | -                  | -                  | -             | -            |
| Sodom* I      | -                  | -                  | 0.004              | -             | -            |
| Sodom* II     | -                  | -                  | 0.007              | -             | -            |
| Sodom* Plant  | 0.004              | -                  | 0.006              | -             | -            |
| En Gedi       | -                  | -                  | -                  | -             | -            |
| En Bokek      | -                  | -                  | -                  | -             | -            |

\* No official sample site name. – Concentration below lowest calibration standard of 0.005 ng/mL.

**Table 22.** Emissions of different VOC from Australian water samples of 2011.

| Samplesite        | Isoprene<br>ng/mL | Benzene<br>ng/mL | Toluene<br>ng/mL | Ethylbenzene<br>ng/mL | Thiophene<br>ng/mL | 2-Methyl-<br>thiophene<br>ng/mL |
|-------------------|-------------------|------------------|------------------|-----------------------|--------------------|---------------------------------|
| Lake Orr*         | 0.006             | 0.004            | -                | 0.016                 | -                  | -                               |
| Lake Springfield* | 0.004             | -                | -                | 0.010                 | 0.016              | 0.006                           |
| Lake Dune*        | 0.006             | -                | -                | -                     | -                  | -                               |
| Lake Golf*        | 0.011             | -                | 0.024            | 0.024                 | -                  | -                               |
| Lake Strawbridge* | 0.029             | -                | 0.021            | -                     | 0.007              | 0.015                           |
| Lake Hatter Hill* | 0.013             | -                | 0.037            | 0.037                 | 0.028              | 0.007                           |
| Lake King         | -                 | -                | 0.047            | 0.024                 | 0.005              | -                               |
| Lake Stubbs       | -                 | -                | 0.036            | 0.026                 | -                  | -                               |

\* No official sample site name. – Concentration below lowest calibration standard of 0.005 ng/mL.

**Table 23.** Emissions of different VOC from Australian water samples of 2012.

| Samplesite        | Isoprene<br>ng/mL | Benzene<br>ng/mL | Toluene<br>ng/mL | Ethylbenzene<br>ng/mL | Thiophene<br>ng/mL | 2-Methyl-<br>thiophene<br>ng/mL |
|-------------------|-------------------|------------------|------------------|-----------------------|--------------------|---------------------------------|
| Lake Newton       | 0.016             | 0.004            | 0.075            | 0.104                 | 0.014              | 0.021                           |
| Lake Strawbridge* | 0.018             | -                | 0.091            | 0.097                 | 0.011              | 0.025                           |
| Lake Boats*       | 0.008             | -                | 0.031            | -                     | 0.008              | 0.005                           |
| Stennets Lake     | 0.036             | -                | 0.033            | 0.047                 | -                  | -                               |
| Lake Dune*        | -                 | -                | -                | -                     | -                  | -                               |
| Lake Orr*         | -                 | -                | -                | 0.037                 | -                  | -                               |
| Lake Emu*         | 0.006             | -                | -                | 0.078                 | -                  | -                               |
| Lake Whurr*       | 0.006             | -                | -                | 0.061                 | 0.004              | -                               |

\* No official sample site name. – Concentration below lowest calibration standard of 0.005 ng/mL.

**Table 24.** Emissions of different VOC from Dead Sea water samples of 2012.

| Samplesite    | Isoprene<br>ng/mL | Benzene<br>ng/mL | Toluene<br>ng/mL | Ethylbenzene<br>ng/mL | Thiophene<br>ng/mL | 2-Methyl-<br>thiophene<br>ng/mL |
|---------------|-------------------|------------------|------------------|-----------------------|--------------------|---------------------------------|
| South End* I  | -                 | -                | 0.172            | 0.038                 | -                  | -                               |
| South End* II | 0.004             | -                | 1.965            | 0.025                 | -                  | -                               |
| Sodom* I      | 0.008             | 0.058            | 12.245           | 0.173                 | -                  | -                               |
| Sodom* II     | 0.008             | 0.018            | 12.564           | 0.158                 | -                  | -                               |
| Sodom* Plant  | 0.008             | 0.019            | 27.037           | 0.136                 | -                  | -                               |
| En Gedi       | 0.008             | -                | 0.163            | 0.027                 | -                  | -                               |
| En Bokek      | 0.010             | -                | 0.224            | 0.049                 | 0.017              | 0.020                           |

\* No official sample site name. – Concentration below lowest calibration standard of 0.005 ng/mL.
